# Supplementary material for: Photoperiod-Dependent Nutrient Accumulation in Rice Cultivated in Plant Factories: A Comparative Metabolomic Analysis
Source: Foods. 2024 May 16;13(10):1544. doi: 10.3390/foods13101544 (PMC11121446; doi:10.3390/foods13101544)
Supplement: Supplementary file 1 [file foods-13-01544-s001.zip]

Archive with 5 entries (5 files):
- Supplementary Figures.pdf
- Table S1 Relative content of metabolites in rice grains under SD and LD conditions.xlsx
- Table S2 Significant differentially accumulated metabolites between rice grains under SD and LD in HHZ.xlsx
- Table S3 Significant differentially accumulated metabolites between rice grains under SD and LD in KY131.xlsx
- Table S4 Significant differentially accumulated metabolites between rice grains under SD and LD in KSR.xlsx
