# Supplementary material for: Photoperiod-Dependent Nutrient Accumulation in Rice Cultivated in Plant Factories: A Comparative Metabolomic Analysis
Source: Foods. 2024 May 16;13(10):1544. doi: 10.3390/foods13101544 (PMC11121446; doi:10.3390/foods13101544)
Supplement: Supplementary file 1 [file foods-13-01544-s001.zip › Table S1 Relative content of metabolites in rice grains under SD and LD conditions.xlsx]

## Sheet: Sheet1
Table S1 Relative content of metabolites in rice grains under SD and LD conditions
Name	Class	Subclass	Q1	Q3	KY131_SD	KY131_LD	KSR_SD	KSR_LD	HHZ_SD	HHZ_LD
4-Phosphopantoate	Vitamin	B5	229.05	55.05	39223.8	17155.9	47938.7	20895.3	20735.2	27611.5
(R)-imazapyr	Vitamin	B3	262	216	514307	491141	263085	236738	519978	293005
(R)-pantoate	Vitamin	B5	149.1	85.05	1.04565e+06	1.47596e+06	1.84628e+06	1.66734e+06	1.06193e+06	770070
(R)-Pantothenic acid 4'-O-b-D-glucoside	Vitamin	B5	382	90	2371.35	596.166	2904.85	2284.61	451.438	432.392
12(R)-HPETE	Lipids	HFA	337.2	57	145439	238280	347714	346120	621374	650982
13(S)-HOT	Lipids	HFA	295.2	93	3.36292e+06	3.07313e+06	3.90116e+06	6.40183e+06	1.64422e+06	1.63032e+06
13,16-Docosadienoic acid	Lipids	FFA	337.3	111	210607	159316	238966	247553	183344	159874
15(S)-HPETE	Lipids	HFA	337	319	1.91826e+07	1.72854e+07	1.78978e+07	2.02951e+07	2.21661e+07	1.84539e+07
16-Hydroxypalmitate	Lipids	HFA	273.2	135	235670	223449	199708	212259	199132	217490
1alpha,24R,25-Trihydroxyvitamin D3;Calcitetrol	Vitamin	D	433	397	387400	808375	288855	1.84556e+06	55064.5	33520.9
1-Feruloyl-5-caffeoylquinic acid	Organic acid		531.15	177.05	222106	357122	1.5284e+06	381643	120703	156872
1-linoleoyl-2-linolenoyl-GPC (18:2/18:3)	Lipids	PC	780.55	184.05	648538	658777	1.83647e+07	6.32799e+06	393644	764073
1-linoleoyl-GPE (18:2)	Lipids	PE	478.3	44.05	1.16504e+07	1.00045e+07	4.33761e+06	2.88068e+06	1.39542e+07	1.58562e+07
1-methyladenine	Nucleotide derivatives		150	133	879285	670789	1.31135e+06	979037	89273.7	232544
1-methylnicotinamide	Vitamin	B3	138.15	93.1	1.4134e+07	2.33894e+07	1.79069e+07	2.3008e+07	1.48871e+06	2.78882e+06
1-myristoylglycerol (14:0)	Lipids	Glycerolipids	320	285	215425	207520	66405	193277	203641	273461
1-oleoyl-2-linoleoyl-GPC (18:1/18:2)	Lipids	PC	784.6	184.05	4.17414e+08	3.73515e+08	4.77548e+08	3.91359e+08	3.78545e+08	3.40755e+08
1-O-Sinapoylglucose	Acylsugar		369.1	207.05	2.22011e+07	3.45374e+07	1.31956e+07	1.72477e+07	9.89427e+06	1.05774e+07
1-palmitoyl-2-oleoyl-GPE (16:0/18:1)	Lipids	PE	718.55	577.5	2.64748e+07	2.61887e+07	4.86055e+07	2.76602e+07	2.28224e+07	2.26356e+07
1-palmitoyl-2-palmitoleoyl-GPC (16:0/16:1)	Lipids	PC	732.55	184.05	1.76337e+08	1.27985e+08	2.74606e+08	2.02514e+08	1.56947e+08	1.36871e+08
1-palmitoylglycerol (16:0)	Lipids	Glycerolipids	331.3	57.05	3.60107e+06	1.73861e+06	6.52953e+06	2.67539e+06	1.69974e+06	2.10145e+06
1-stearoyl-2-oleoyl-GPC (18:0/18:1)	Lipids	PC	788.6	184.05	1.27689e+08	4.92448e+07	2.20864e+08	1.01016e+08	7.81708e+07	6.97363e+07
1-stearoyl-GPE (18:0)	Lipids	PE	482.3	341.3	1.55257e+07	6.82184e+06	4.55613e+07	1.44461e+07	6.08662e+06	6.45369e+06
1α-25-dihydroxyvitamin D2	Vitamin	D	429.35	133.05	641589	645501	423436	504526	653128	476101
2-(5-hydroxy-1H-indol-3-yl)acetic acid	Organic acid		192.1	146.1	796784	208390	98884.4	152623	1.53048e+06	196635
2-(Formamido)-N1-(5-phospho-D-ribosyl)acetamidine	Vitamin		314.05	58.05	39466.8	36551.1	22346.6	11146.2	40861.5	31584.6
2',3'-Dihydro-phytomenadione	Vitamin	D	453	435	28273.5	27998	55489.3	44082.1	47159.1	35662.1
2-[(8-Carboxyoctanoyl)oxy]-3-(palmitoyloxy)propyl 2-(trimethylammonio)ethyl phosphate	Lipids	PC	666.45	184.05	228207	141540	443669	173334	57968.1	44922.2
22-Oxodocosanoate	Lipids	FFA	355.3	69	1.15781e+06	1.14881e+06	2.79245e+06	1.9783e+06	1.23839e+06	1.99995e+06
24,25-Dihydrolanosterol	Terpene		429.4	411.4	320229	510297	341021	404659	208824	797973
25-Hydroxyvitamin D2	Vitamin	D	413.35	159.1	31513.3	30487.6	72886.3	34891.9	44988.4	15765.3
25-hydroxyvitamin D3	Vitamin	D	401.35	341.3	1.3729e+06	1.20085e+06	584779	1.63575e+06	827425	758120
2-aminoadipate	Organic acid		162	70	306514	148707	874092	676580	809217	171216
2-aminoheptanoate	Lipids	FFA	146.1	100.1	2.05883e+06	2.41079e+06	4.06842e+06	5.24034e+06	2.44566e+06	2.25169e+06
2'-Deoxyinosine-5'-monophosphate	Nucleotide derivatives		333.1	137.1	9.28841e+07	9.35181e+07	9.41339e+07	7.85056e+07	1.11578e+08	9.93891e+07
2-linoleoylglycerol (18:2)	Lipids	Glycerolipids	355.3	263.25	6.39708e+06	6.25514e+06	1.9053e+07	1.10816e+07	7.11237e+06	1.33903e+07
2-methyl-3-hydroxy-5-formylpyridine-4-carboxylate	Organic acid		182.05	136.05	1.23413e+07	1.46982e+07	1.96807e+07	1.40737e+07	5.19471e+06	7.17095e+06
2-methylene-glutarate	Organic acid		144.95	69.05	4.91451e+06	6.17802e+06	4.98705e+06	5.08978e+06	3.57046e+06	4.22467e+06
2-Methylnicotinamide	Vitamin		137	120	65453.5	32940.4	46285.7	31403.9	79063.8	21901.2
2-O-p-Coumaroylhydroxycitric acid	Organic acid		355.05	147.05	2.10524e+06	1.72594e+06	4.32522e+06	3.50545e+06	1.95569e+06	2.62e+06
3-[(1-Carboxyethenyl)oxy]benzoic acid	Organic acid		208.05	120.1	154316	94043	139737	65066	28187.4	37836.7
3-Hydroxy-3-Methyl Butyric Acid	Organic acid		119.05	119.05	680705	1.56028e+06	789503	737745	5.02538e+06	795766
3-methylglutaconate	Organic acid		145.05	85.05	4.69762e+06	1.41135e+07	8.84686e+06	1.00304e+07	1.03948e+07	9.85998e+06
3-methyl-oxobutanoate	Organic acid		117	89	480915	933405	1.21821e+06	820462	265438	505288
3-o-Ethyl-L-ascorbic acid	Vitamin	C	205	169	2619.46	2089.02	2011.11	2192.15	3156.58	2319.92
3-sulfo-L-alanine/Cysteic acid	Amino acid derivative		170	124	1.18361e+06	432089	928126	368997	372676	283107
4-Amino-5-hydroxymethyl-2-methylpyrimidine	Vitamin	E	140	81	161619	105887	200818	217815	210798	247115
4-amino-butanoate	Organic acid		104.05	69.05	192412	67962.3	208122	47888	109551	40962.4
4-coumarate	Organic acid		165.05	119.05	1.11556e+07	7.98947e+06	1.90352e+07	1.52642e+07	1.90634e+06	2.35305e+06
4-Hydroxy-6-methylquinoline-3-carboxylic acid	Organic acid		204.05	144.05	2.40189e+06	1.6503e+06	2.59708e+06	3.52276e+06	2.87133e+06	1.88702e+06
4-Hydroxy-L-threonine	Amino acid derivative		136.05	118.05	399596	486846	722507	574145	214297	261356
4-Hydroxysphinganine	Lipids	Sphingolipids	318.3	256.3	2.46303e+08	2.49334e+08	2.39107e+08	2.28184e+08	2.26091e+08	2.29554e+08
4-imidazoleacetate	Organic acid		127	81	5.4174e+06	7.1391e+06	5.6632e+06	5.15615e+06	5.70854e+06	5.4014e+06
4-Methyl-(2'-hydroxyethyl)-thiazole	Vitamin	B1	144.05	126.05	497419	500631	307088	670383	424788	712383
4-Methyl-5-thiazoleethanol	Vitamin	B1	144.1	113.1	664409	1.92016e+06	396009	578139	3.0376e+06	2.10958e+06
4-Pyridoxic acid O-hexoside	Vitamin	B6	346.1	184.1	25744.9	23597.8	37061.1	58545.7	15256.4	20417.1
5-(2-Hydroxyethyl)-4-methylthiazoleacetat	Vitamin		186.05	144.05	17899.5	8141.79	8511.55	14848.9	22676.3	17084.6
5-(2-hydroxyethyl)-methylthiazole	Vitamin		186.05	98	782819	547557	987133	1.15428e+06	1.10161e+06	565888
5(S)-HETE	Lipids	HFA	321.25	257	2.3099e+06	2.67105e+06	2.04269e+06	2.28121e+06	2.42391e+06	2.61909e+06
5(S)-HPETE	Lipids	HFA	337.2	239	654424	738780	1.40601e+06	987997	746233	1.09698e+06
5,6-DHET	Lipids	HFA	339	81	2.34017e+06	3.18666e+06	5.13089e+06	3.8029e+06	2.60302e+06	4.91306e+06
5-amino- 6-ribosylamino-2,4 (1H,3H)-pyrimidinedione 5-phosphate	Vitamin		355.05	143.05	307767	446231	524520	640514	290674	347320
5-Amino-6-ribitylamino uracil	Vitamin		277.1	143.05	29243.2	59204.9	36692	53165.7	52564.9	44188.3
5-Aminoimidazole-4-carboxamide-1-β-D-ribofuranosyl 5'-monophosphate	Vitamin		340.05	97.05	407797	366607	303680	299544	274064	328767
5'-Deoxy-5'-(methylthio)adenosine	Nucleotide derivatives		298.1	136.05	9.81277e+06	7.31047e+06	1.28209e+07	1.39714e+07	1.24002e+07	3.82687e+06
5-oxoproline	Amino acid derivative		130	84	1.27311e+07	1.0671e+07	1.71752e+07	1.74628e+07	1.29425e+07	9.56371e+06
5-Phosphoribosylamine	Vitamin		230.05	99	56776	23723	76719.5	44333.2	22606.4	33099
5'-Phosphoribosylglycinamide	Vitamin		286.05	58.05	12833.2	24667.1	54578.4	12483.6	5270.38	4131.3
6-Aminonicotinic acid	Vitamin		139	93	8.29958e+06	1.61004e+07	9.06539e+06	1.40633e+07	910491	974907
6-oxopiperidine-2-carboxylate	Organic acid		144.05	98.05	6.83522e+06	6.58826e+06	1.43966e+07	1.48806e+07	3.80052e+06	3.98173e+06
7-methylguanine	Nucleotide		166	96	1.47512e+07	1.04077e+07	1.63022e+07	2.06473e+07	488477	599015
8-[(1R,2R)-3-Oxo-2-{(Z)-pent-2-enyl}cyclopentyl]octanoate	Lipids		295.2	69	267910	247699	539618	430603	281554	423377
8-Amino-7-oxononanoate;KAPA	Vitamin	B7	188	170	24582.5	73758.3	270224	91616.9	3740.35	35280.9
8-methylthiooctyl glucosinolate	Organic acid		478	81	722591	654073	313971	201761	950047	975905
9(S)-HPODE	Lipids	HFA	313.2	67	2.92238e+06	2.19558e+06	5.62277e+06	3.05326e+06	2.50947e+06	2.94618e+06
9,10-12,13-Diepoxyoctadecanoate	Lipids	FFA	313.2	57	1.5208e+07	1.03963e+07	2.74118e+07	1.55569e+07	1.14945e+07	1.44343e+07
9,10-DiHOME	Lipids	HFA	337.25	83.1	2.14521e+06	2.16619e+06	4.85906e+06	3.7274e+06	2.18298e+06	3.72987e+06
9,10-Dihydroxystearate	Lipids	HFA	317.2	299	63737.1	38597.9	13994.3	47966.2	49754.3	73883.9
ACC	Phytohormone		102	56	727937	912301	1.1792e+06	1.21232e+06	808261	659441
Acetylcholine	Alkaloid		146	86	1.48072e+07	9.31739e+06	1.27974e+07	8.20217e+06	6.64042e+06	1.18377e+07
Adenine	Nucleotide		136.05	119.05	6.0742e+07	2.95143e+07	1.77005e+07	1.39501e+07	1.9076e+07	8.59805e+06
adenosine 2'-monophosphate (2'-AMP)	Nucleotide derivatives		348	136	5.76993e+06	1.03253e+07	1.33736e+07	7.23545e+06	9.57792e+06	6.79528e+06
adenosine 3'-monophosphate (3'-AMP)	Nucleotide derivatives		348	136	3.82525e+06	6.03667e+06	8.45711e+06	6.5806e+06	3.86316e+06	4.32376e+06
Adenosine O-ribose	Nucleotide derivatives		400.2	136.1	259809	73394.8	271433	191951	123017	120744
AICA	Vitamin	B1	339	97	32374	17385.7	66583.6	22444.8	23735.4	336817
Ala dihexosyl derivative	Amino acid derivative		432.15	90.05	3.97085e+06	2.60243e+06	2.60593e+06	1.92211e+06	486149	992897
Ala tethexosyl derivative	Amino acid derivative		774.25	432.15	157290	139786	162374	143829	94439.9	100057
Ala-glu	Amino acid derivative		218.1	44.05	838619	835071	667748	609789	673343	629533
Alanine	Amino acid		90.1	44	4.96992e+06	1.89696e+06	1.98088e+06	1.8935e+06	636487	945909
alanylisoleucine	Amino acid derivative		203.15	157.15	114569	118375	173276	151569	102479	148105
alanylleucine	Amino acid derivative		203.15	157.15	3.576e+06	3.87948e+06	2.4439e+06	2.32968e+06	4.85685e+06	4.10551e+06
Ala-val	Amino acid derivative		189.1	118.1	1.10652e+07	2.26941e+07	2.87562e+07	1.92945e+07	6.04862e+06	1.12903e+07
alpha.epsilon-Diaminopimelic acid	Organic acid		191.1	84.1	2.13201e+06	494775	8.61984e+06	2.70513e+06	628300	679338
alpha-ketoglutarate	Organic acid		147.05	101	3.9445e+06	2.69099e+06	3.60321e+06	3.14774e+06	2.49172e+06	2.69966e+06
alpha-Pinene-2-oxide	Terpene		153.1	125.1	84057.3	99797.3	86760.7	85267.8	64687.8	67482.2
alpha-Tocopherolquinone	Vitamin	E	447	411	7176.54	5415.22	6692.74	880.125	167684	1620.64
alpha-tocotrienol	Vitamin	E	425	165.1	4506.03	5478.13	4373.82	5133.69	1868.08	2131.07
Aminobutyric Acid	Amino acid derivative		104.05	45	1.15666e+08	7.23987e+07	2.3916e+08	1.92138e+08	2.31945e+07	5.16191e+07
Aminoimidazole ribotide	Vitamin		296.05	57.05	4031.01	3177.7	2958.38	4430.92	3415.06	21856.1
Aminoimidazole ribotide	Vitamin		296.05	57.05	44140	34952.8	44928.2	40737.3	51816.9	47911.9
Aminopterin	Vitamin	B9	441	175	3293.94	10929.1	6531.8	7937.99	7383.44	1864.58
Apigenin 5-O-glucoside	Flavonoid		433.1	271.05	133377	214644	73709.2	104017	178620	170819
Apigenin 6-C-glucoside	Flavonoid		433.1	367.2	383255	773349	303827	1.81395e+06	59947	38453
arabitol	Saccharides		153	69	55872.3	67687.3	40500.3	53700	63545.7	56048.1
arabonate	Saccharides		167.05	121.05	7.24319e+06	6.56593e+06	2.27197e+07	7.23365e+06	5.27836e+06	3.43389e+06
Arginine	Amino acid		175.1	70.1	3.77829e+07	3.78991e+07	4.34313e+07	2.40844e+07	6.12481e+06	9.73011e+06
Asn dihexosyl derivative	Amino acid derivative		475.2	133.05	7.11064e+06	2.22049e+06	6.21111e+06	2.01267e+06	2.8139e+06	2.01092e+06
Asn-trp	Amino acid derivative		319.15	115.05	87283	258072	254582	175850	47605.5	102207
Asp dihexosyl derivative	Amino acid derivative		476.15	134.05	2.12853e+06	4.25722e+06	3.37182e+06	4.1831e+06	2.0159e+06	1.55602e+06
asp-ala	Amino acid derivative		205.1	159.1	1.43433e+07	2.63477e+07	3.70609e+07	2.41281e+07	6.89234e+06	1.39604e+07
Asparagine	Amino acid		133.05	74	1.80298e+07	4.37855e+06	1.22236e+07	4.59701e+06	1.11742e+07	5.47612e+06
Aspartic acid	Amino acid		134.05	88.05	628050	689495	740887	807436	775738	488417
Astragalin	Flavonoid		449.1	287.05	42787.6	113995	6724.88	42470.5	133284	165112
beta-Homothreonine	Amino acid derivative		134	73.9	1.9279e+06	2.26787e+06	2.15478e+06	2.90578e+06	2.24219e+06	1.37464e+06
Betaine	Alkaloid		118.2	59	5.56621e+06	1.20542e+07	5.40358e+06	4.80452e+06	2.99005e+07	5.07359e+06
Sitosterol	Vitamin	D	397	161	2.2327e+06	1.08886e+06	2.37102e+06	1.52867e+06	1.99563e+06	884850
Biflorin	Flavonoid		355.2	163	2.73685e+06	2.38818e+06	5.30411e+06	5.07667e+06	3.13274e+06	4.21131e+06
Biotin sulfone	Vitamin		277	195	9016.01	31636.6	195514	20144.7	5708.08	266013
Biotin-X-NHS	Vitamin	B7	455	114	2263.12	1597.78	1173.49	1070.26	1305.13	1038.75
Bisnorbiotin	Vitamin		217	143	27894.8	125304	52783.3	67999.5	16332.9	29532.4
Calcitriol	Vitamin	D	417.35	399.35	4.63905e+06	3.87171e+06	1.28647e+06	6.62784e+06	2.71987e+06	2.5052e+06
campesterol	Lipids	Sterol Lipids	383.35	147.1	3.84555e+06	1.94424e+06	4.43338e+06	2.80031e+06	4.08704e+06	2.01109e+06
Carbachol	Choline		147	88	473519	301315	439189	290400	322370	388540
carboxyethyl-GABA	Organic acid		176.1	130.1	686784	927879	971931	744203	1.05116e+06	916483
Carnitine	Alkaloid		162.1	74.1	342016	277473	370261	518243	1.36491e+06	499450
CDP-choline	Choline		489.1	264	357460	719447	746544	934375	446660	275799
Cellotriose	Saccharides		527.2	347.2	2.27245e+06	2.84289e+06	3.01491e+06	2.18739e+06	1.30495e+06	1.42369e+06
C-hexosyl-apigenin O-feruloylhexoside	Flavonoid		771.2	433.1	1.35474e+06	2.52392e+06	4.54684e+06	5.51876e+06	776022	684015
C-hexosyl-apigenin O-p-coumaroylhexoside	Flavonoid		741.2	147.2	121698	109843	291264	354087	18197.8	21298.1
C-hexosyl-C-pentosyl-apigenin	Flavonoid		565.2	499.2	7.90687e+06	1.31798e+07	1.94366e+07	2.39258e+07	2.30421e+06	2.61407e+06
C-hexosyl-luteolin O-pentoside	Flavonoid		581.2	431.1	334660	773496	1.50226e+06	2.19845e+06	1.21266e+06	958353
Chinese bittersweet alkaloid II	Alkaloid		340.1	322.2	38811.2	40525.4	48502.9	33474.2	61427.4	47231.1
Choline	Choline		104.1	60.1	1.82571e+08	1.28235e+08	3.30459e+08	2.76787e+08	5.48062e+07	9.45827e+07
Chorismate	Organic acid		227.05	209.05	36163.9	14268.7	39096.8	47613.3	16127.7	52275.1
Chrysoeriol 5-O-hexoside	Flavonoid		463.1	301.1	284691	591177	348859	497239	502841	616844
Cocamidopropyl betaine	Alkaloid		343	240.3	1.71545e+07	1.7791e+07	1.87196e+07	1.6358e+07	1.83296e+07	1.75601e+07
Cosmosiin	Flavonoid		433.1	271.05	153031	206598	101284	81464.6	199982	322136
Coumaric acid	Organic acid		165.05	91.05	1.83763e+07	1.39623e+07	2.27065e+07	2.5508e+07	1.97103e+06	2.27447e+06
C-pentosyl-apeignin O-feruloylhexoside	Flavonoid		741.1	177.1	12451.3	15750.7	47577.1	48716.1	2144.5	3040.62
C-pentosyl-apigenin O-hexoside	Flavonoid		565.1	367.1	229314	383180	602244	709611	60119.4	82160.1
C-pentosyl-apigenin O-hexoside	Flavonoid		565.1	367.1	425258	624026	953886	1.06716e+06	120422	148520
C-pentosyl-apigenin O-hexoside	Flavonoid		565.1	367.1	3769.36	13539.1	9128.65	4919.19	194138	518456
C-pentosyl-luteolin O-hexoside	Flavonoid		581.1	431.1	125333	354625	530201	939185	328368	365793
Crepenynate	Lipids		279.2	109	6.76192e+06	4.52385e+06	7.10785e+06	7.2969e+06	3.27985e+06	2.53323e+06
Crepenynate	Lipids		279.2	109	1.97491e+07	1.83069e+07	4.55341e+07	2.71374e+07	2.04582e+07	2.64778e+07
Cyanidin 3-O-glucoside	Flavonoid		449.1	287	1.36446e+07	1.7425e+07	3.32687e+06	5.39492e+06	1.88035e+07	1.63757e+07
Cys-his	Amino acid derivative		259.1	104	1.92586e+07	1.39881e+07	3.18121e+07	3.07168e+07	1.37324e+07	1.5734e+07
Cysteinylglycine	Amino acid derivative		179	76	226292	247230	481416	397655	236913	306944
Cystine	Amino acid derivative		241.05	152	325049	157044	292384	216424	122041	233784
Cys-trp	Amino acid derivative		308.1	76	9.74296e+06	1.69825e+07	1.78189e+07	2.16859e+07	2.89524e+07	1.66691e+07
Cytidine	Nucleotide		244.3	112.1	1.11301e+06	1.41445e+06	2.44899e+06	2.51379e+06	1.50036e+06	911637
Gluconic acid δ-lactone	Organic acid		347.1	347.1	2.22023e+06	3.53219e+06	2.32955e+06	3.16611e+06	1.49285e+06	1.47648e+06
Dehydropinifolic acid	Vitamin	B9	335	189	506706	939549	1.49629e+06	1.27333e+06	154952	307364
D-Erythroascorbic acid 1'-a-D-glucoside	Vitamin	C	309	57	1434.04	2384.75	2681.51	363.297	1667.1	3.21538e+06
Desmosterol	Terpene		385.35	325.3	376794	480195	1.08337e+06	740701	444088	740923
dihydroferulic acid	Organic acid		197.1	151.1	126526	127099	43074.5	72826.8	9382.49	22352.1
Dihydrozeatin-O-glucoside	Phytohormone		384	136	316826	148155	229619	219715	180162	110287
dimethylarginine	Amino acid derivative		203	70	1.17391e+07	1.04507e+07	1.89023e+07	8.75875e+06	1.57576e+06	6.51588e+06
dl-alpha-Tocopherol nicotinate	Vitamin		536	518	21134.4	8814	13040.6	19598	77999.9	294598
D-Mannitol	Saccharides		183.1	69.05	83788.4	210006	122742	142880	138025	231755
Docosanoic acid	Lipids	FFA	341.3	41	76542	57717.8	156189	79882.3	58809.5	81629.2
Epicatechin O-hexoside derivative	Flavonoid		557.2	177.1	5.20887e+06	5.78083e+06	4.17033e+06	2.69493e+06	4.89208e+06	4.3656e+06
Episterol	Vitamin	D	399.35	381.35	324179	63605.2	434237	130269	146654	221178
Ergocalciferol	Vitamin	D	397.35	133.1	26572.8	11313.8	65675.6	19117.4	19646.8	17690.7
Ergosterol	Lipids	Sterol Lipids	397	57.1	8598.52	2630.16	8434.21	5200.91	5257.63	4542.82
Erucic acid	Lipids	FFA	399.3	303	7219.21	4285.13	4944.22	4280.32	4693.48	3105.88
erythritol	Saccharides		123.05	61.05	52884.6	177966	222533	175064	44214.9	56378.6
erythronate	Organic acid		137.05	43	105277	85491.3	87446.4	88136.4	94055.2	77499.3
Esculin Hydrate	Flavonoid		341.1	341.1	5.79102e+06	4.44521e+06	9.67219e+06	5.28338e+06	4.51644e+06	5.56499e+06
FA 12:2	Lipids	FFA	197.15	179.15	275622	90682.4	151580	130981	217770	85969.8
FA 18:0	Lipids	FFA	285.3	57	1.51537e+06	1.1111e+06	3.62839e+06	3.18525e+06	698349	742336
FA 18:1	Lipids	FFA	283.25	57.05	390391	461821	764254	513849	559585	445968
FA 18:3	Lipids	FFA	279.25	67.05	7.03963e+06	4.59383e+06	7.70804e+06	7.42321e+06	3.40478e+06	2.56435e+06
FA 18:5	Lipids	FFA	275.2	257.2	3.22675e+07	3.17643e+07	4.27527e+07	2.98377e+07	2.77923e+07	2.64816e+07
FA 20:5-OH	Lipids	HFA	319.25	283.2	1.4993e+07	1.06774e+07	7.30638e+07	1.68535e+07	1.20841e+07	1.50816e+07
Farnesyl acetone	Phenolamine		263.25	95.1	6.67312e+07	5.77804e+07	8.52121e+07	7.56289e+07	7.75516e+07	7.13914e+07
ferulic acid	Organic acid		195.05	89.05	1.72381e+06	1.26455e+06	1.49488e+06	986043	1.19591e+06	970745
Ferulic acid O-hexoside	Acylsugar		357.1	177.1	1.42783e+07	2.36724e+07	2.59767e+07	2.39361e+07	6.48225e+06	1.02609e+07
Ferulic acid O-lichenin	Acylsugar		339.1	177.1	3.60332e+07	3.46299e+07	4.48926e+07	3.72144e+07	1.4253e+07	1.59516e+07
Feruloyl putrescine derivative	Phenolamine		280.1	177.1	5167.46	10098.2	62439	35521.4	2966.2	8177.32
feruloyl-acetyl O-lichenin	Acylsugar		381.1	177.1	391095	710547	447491	611242	508427	403495
feruloyl-acetyl O-lichenin	Acylsugar		381.1	177.1	173040	234982	192828	158430	178769	150957
Feruloylquinic acid	Organic acid		369.1	177.05	101092	51919.3	273721	381222	43845.8	13648.4
folinic acid	Vitamin	B9	474.15	327.1	2.09605e+07	3.44584e+07	5.80899e+06	2.86326e+07	1.34855e+07	1.29819e+07
fumarate	Organic acid		117	71	6.16605e+06	1.6638e+06	1.21677e+07	5.03701e+06	570894	2.27647e+06
gamma-aminobutyrate (GABA)	Amino acid derivative		104.05	58.05	9.42757e+07	6.051e+07	2.08554e+08	1.67912e+08	2.48665e+07	4.36155e+07
Gamma-glutamyl Glutamine	Amino acid derivative		276.1	84.1	2.0576e+06	644554	386049	397163	859148	336456
gamma-glutamylalanine	Amino acid derivative		219.1	88.05	78895.3	30610.8	53211.6	59591	72439.2	44882.5
gamma-glutamylglutamine	Amino acid derivative		276.1	147.1	1.39094e+06	433668	161827	172843	574806	195203
gamma-glutamylglycine	Amino acid derivative		205.1	130.05	6.90183e+06	1.25309e+07	1.84611e+07	1.21169e+07	3.1871e+06	6.85799e+06
gamma-glutamylisoleucine	Amino acid derivative		260.15	84.05	723774	322446	575525	424895	191116	202993
gamma-glutamylleucine	Amino acid derivative		261.15	84.1	715584	357011	661336	710664	625205	618855
gamma-glutamylvaline	Amino acid derivative		246.15	70.05	7.88522e+06	8.65238e+06	6.67227e+06	6.36366e+06	7.26275e+06	6.44569e+06
Gln dihexosyl derivative	Amino acid derivative		489.2	147.1	250432	185651	296354	241810	103486	102527
glucosaminate	Organic acid		196.1	72.05	204514	181066	242667	246725	243402	127828
Glucose(+)	Saccharides		181.05	85	221398	653961	426085	519760	468568	461487
glu-cys-γ	Amino acid derivative		251.05	84.05	805482	700015	1.00404e+06	1.27943e+06	647370	784173
glutamate, gamma-methyl ester	Amino acid derivative		162.1	58.05	92605.8	105735	196922	214622	145958	205395
Glutamic acid	Amino acid		148.05	84.05	2.14061e+07	3.24565e+07	3.55651e+07	3.69151e+07	2.44765e+07	1.74853e+07
Glutamine	Amino acid		147.05	84.05	9.87665e+06	4.25744e+06	1.18953e+07	5.68054e+06	4.38199e+06	3.41739e+06
glutarate (pentanedioate)	Organic acid		133	87	1.38584e+06	472812	1.35577e+06	962719	593011	523714
Glutathione	Amino acid derivative		308.1	179.05	4.04115e+06	6.19748e+06	8.97346e+06	8.59821e+06	1.04323e+07	5.5243e+06
Gly dihexosyl derivative	Amino acid derivative		418.15	145.05	325683	313487	350097	260985	147567	230246
Gly tethexosyl derivative	Amino acid derivative		760.25	418.15	77482.7	68826.7	114126	79337.3	33496.5	47398.8
glycerophosphorylcholine (GPC)	Lipids	PC	258.1	86.1	7.17032e+07	5.8273e+07	1.06773e+08	1.12636e+08	4.54759e+07	5.65537e+07
Glycidyl oleate	Lipids	Glycerolipids	339.3	83.1	2.94505e+06	2.19108e+06	1.14382e+07	3.90986e+06	3.78717e+06	4.37746e+06
Glycine	Amino acid		76	30.15	19126.7	10992.2	23485.9	22547.6	17691.6	14879.7
GPCho 36:0	Lipids	PC	790.65	184.05	1.4053e+07	4.86182e+06	2.94468e+07	1.11421e+07	8.82683e+06	7.02114e+06
GPCho 36:2	Lipids	PC	786.6	184.05	3.74608e+08	2.69189e+08	4.54494e+08	2.67767e+08	2.85804e+08	2.85839e+08
GPCho 36:5	Lipids	PC	780.55	184.05	8.09217e+07	6.30726e+07	1.93236e+08	1.01683e+08	4.43925e+07	4.20814e+07
guanidinosuccinic acid	Organic acid		176.05	60.05	312686	399456	372168	133063	167711	158220
Guanine	Nucleotide		152	135	1.44753e+07	9.86968e+06	1.14982e+07	6.81361e+06	1.58694e+07	1.84811e+07
Hepoxilin B3	Lipids		359	219	379217	1.27979e+06	156724	678889	2.34349e+06	2.20957e+06
Heptadecatrienoic acid	Lipids	FFA	265.2	55	7.04239e+06	8.17498e+06	1.97989e+07	1.37689e+07	9.7504e+06	1.33326e+07
Heteropyrithiamine-glu	Vitamin		363	201	76069.3	234665	391358	85694.8	153039	85993.5
Hexadecanoic acid	Lipids	FFA	255.2	237.2	101702	114236	85231.8	126354	124928	100263
Histidine	Amino acid		156.1	110.1	1.22632e+06	5.16745e+06	3.11909e+06	4.29195e+06	1.83936e+06	2.10073e+06
Homocystine	Amino acid derivative		269.1	135.9	26662.1	13499.9	23245.5	25288	11237.4	8523.33
Hyperin	Flavonoid		465.1	303.05	37139.2	77494.1	58745.8	83377.5	409560	377889
IAA	Phytohormone		176.1	130	398469	116865	277534	354339	651554	89094.8
indole	Indoles		118.05	65.05	4501.4	1456.21	904.565	1347.98	636.727	2013.36
indole-3-acetyl-L-asparticacid	Amino acid derivative		291.1	130.05	26180.7	237046	18771.9	7831.69	2.03304e+06	9.7456e+06
Indole-3-carboxaldehyde	Phytohormone		146.1	118.1	9.51216e+06	1.96846e+07	2.41786e+07	1.73127e+07	5.38628e+06	1.01512e+07
indole-3-lactic acid	Phytohormone		206.05	160.05	1.85376e+06	2.95053e+06	4.33641e+06	2.84525e+06	786668	1.64812e+06
indolelactate	Organic acid		205	118	8.44564e+07	1.33191e+08	1.80275e+08	1.3565e+08	3.8955e+07	8.08361e+07
Inosine	Nucleotide		269	137	267213	169619	216283	163282	728536	114932
Inosine 5'-monophosphate	Organic acid		349.1	137	423996	710934	990563	583204	781467	494060
inositol pentakisphosphate	Organic acid		580.9	544.9	594378	1.48123e+06	2.6535e+06	4.12582e+06	2.27233e+06	1.88431e+06
iP9G	Nucleotide derivatives		366.2	204.2	4.34912e+06	5.70961e+06	5.52875e+06	4.09309e+06	2.73333e+06	4.96221e+06
Isorhoifolin	Flavonoid		579.15	271.05	37159	49166.8	660835	519992	1.50075e+06	4.97247e+06
Isoscoparin 2''-(6-(E)-ferulylglucoside)	Flavonoid		801.2	301.05	1.45347e+06	2.57865e+06	2.42472e+06	3.01385e+06	1.40708e+06	1.92534e+06
Isovitexin	Flavonoid		433.1	283.05	1.70114e+06	3.30173e+06	1.27926e+06	7.55287e+06	245222	135540
Isovitexin 7-O-beta-[6'''-O-(E)-p-feruloyl]glucoside	Flavonoid		771.2	177.05	994991	1.74151e+06	3.24175e+06	3.85614e+06	516689	464141
jasmonic acid	Phytohormone		211.15	91.05	1.70848e+06	1.79885e+06	2.51004e+06	1.33741e+06	2.1802e+06	1.89841e+06
Kynurenic Acid	Organic acid		190.05	144	1.47278e+06	1.43961e+06	1.67541e+06	1.19448e+06	3.01299e+06	1.02115e+06
L-Ascorbic acid	Vitamin	C	177.05	85.05	94566.3	95203.5	114299	99673.3	67702.3	79016.6
L-Ascorbic acid O-pentose	Vitamin	C	309	85	401172	649314	562839	650114	676262	214458
Leucine	Amino acid		132.1	86.1	2.7668e+06	2.67289e+06	5.387e+06	2.6058e+06	3.01779e+06	2.35429e+06
leucylglutamine	Amino acid derivative		260.15	86.1	1.15554e+06	697925	1.67173e+06	1.50753e+06	493405	708883
Limocitrin O-hexoside	Flavonoid		509.3	347.1	825133	946598	985304	956323	328475	483885
Linoleic Acid-biotin	Vitamin		521	503	3.76002e+07	2.5667e+07	1.26994e+07	1.01485e+07	3.82989e+07	3.53468e+07
linoleoyl ethanolamide	Lipids	PE	324	62	2.27552e+06	1.35003e+06	2.79872e+06	3.30034e+06	1.274e+06	1.12549e+06
L-Isoleucine	Amino acid		132.1	86.1	4.35323e+06	3.40246e+06	1.02455e+07	4.31431e+06	4.1453e+06	3.3727e+06
LPE 18:2	Lipids	PE	478.3	337.25	1.49213e+08	1.37195e+08	7.08128e+07	5.45256e+07	1.80613e+08	1.7828e+08
L-Tryptophan	Amino acid		205.1	146.05	1.3151e+08	1.72632e+08	2.17092e+08	1.89139e+08	6.56139e+07	1.25066e+08
Luteolin 6-C-glucoside	Flavonoid		449.1	299.2	505392	4.03898e+06	796248	7.99989e+06	628919	894954
Luteolin 7-O-glucoside	Flavonoid		449.1	287.05	749327	1.11202e+06	534968	846207	7.68236e+06	7.40903e+06
Lysine	Amino acid		147.1	84.1	9.15996e+06	4.29482e+06	9.53252e+06	4.82126e+06	4.45636e+06	3.13041e+06
Lysine butyrate	Organic acid		235.3	118.1	1.45315e+06	7.18213e+06	964329	1.05176e+06	6.49004e+07	2.62437e+06
LysoPC 12:0	Lipids	PC	440.3	104.1	1.3209e+07	6.77854e+06	1.93539e+06	3.71328e+06	1.25842e+07	1.11065e+07
LysoPC 14:0	Lipids	PC	468.3	184.05	2.30293e+08	2.82469e+08	2.83227e+08	2.43574e+08	2.66066e+08	2.27727e+08
LysoPC 14:1	Lipids	PC	466.3	104	1.22998e+06	598324	274333	458193	1.10329e+06	1.06874e+06
LysoPC 16:0 (sn-1)	Lipids	PC	496.35	184.05	2.77115e+08	1.86116e+08	3.43222e+08	1.43939e+08	2.64076e+08	3.67286e+08
LysoPC 16:0 (sn-2)	Lipids	PC	496.35	478.35	3.57426e+07	2.33541e+07	2.74059e+07	1.49532e+07	3.05573e+07	3.17134e+07
LysoPC 16:1	Lipids	PC	494.3	104.1	3.88602e+06	2.40898e+06	4.39047e+06	2.33303e+06	3.29231e+06	3.32181e+06
LysoPC 18:0	Lipids	PC	524.35	184.05	2.3097e+08	1.68968e+08	2.6165e+08	1.76267e+08	1.35271e+08	1.77719e+08
LysoPC 18:1	Lipids	PC	522.35	104.1	3.13582e+08	3.11596e+08	2.71882e+08	2.3124e+08	2.29294e+08	2.93412e+08
LysoPC 18:2 (sn-1)	Lipids	PC	520.35	184.05	4.43424e+08	4.67608e+08	3.47792e+08	3.44897e+08	4.59814e+08	4.60933e+08
LysoPC 18:2 (sn-2)	Lipids	PC	520.35	104.1	4.6589e+08	4.01044e+08	2.14082e+08	2.08157e+08	4.85185e+08	4.70436e+08
LysoPC 18:3	Lipids	PC	518.3	184.05	9.0492e+07	5.1938e+07	3.01926e+07	2.29112e+07	5.61252e+07	6.11391e+07
LysoPC 19:0 (sn-2)	Lipids	PC	538.4	184.05	1.00982e+06	631190	509278	499468	237230	427764
LysoPC 19:0 (sn-1)	Lipids	PC	538.4	104.1	564603	457274	312249	313649	355697	380173
LysoPC 20:0	Lipids	PC	552.4	184.05	1.31091e+07	3.30835e+06	7.60348e+07	1.50848e+07	1.96645e+06	3.07305e+06
LysoPC 20:2 (sn-2)	Lipids	PC	548.35	104.1	268245	219847	162472	134375	191769	229454
LysoPC 20:2 (sn-1)	Lipids	PC	548.35	184.05	1.87141e+06	830262	1.03731e+06	578649	1.24036e+06	1.20338e+06
LysoPE 14:0	Lipids	PE	426.25	285.25	6.21205e+07	3.81446e+07	4.14512e+07	4.11666e+07	5.44559e+07	5.34502e+07
LysoPE 15:0	Lipids	PE	440.3	299.25	2.42297e+06	829057	3.66562e+06	1.05118e+06	1.22591e+06	1.29925e+06
LysoPE 16:1	Lipids	PE	452.3	311.25	26872.8	13876.9	46662.7	24265.3	59030.6	42762.9
LysoPE 18:1	Lipids	PE	480.3	339.3	6.09016e+07	6.82233e+07	9.94155e+07	4.86761e+07	3.48297e+07	7.35962e+07
LysoPE 18:3	Lipids	PE	476.3	335.25	8.86136e+06	5.87146e+06	2.9742e+06	3.30968e+06	6.12341e+06	7.389e+06
malonate	Organic acid		105	61	7.97487e+06	4.78785e+06	2.03233e+07	1.56968e+07	2.04529e+06	3.51509e+06
Maltopentaose	Saccharides		846.3	325.1	177914	221240	215538	234053	123722	114450
Maltotetraose	Saccharides		684.25	325.1	381270	492108	472581	390919	362701	360373
Maltotriose	Saccharides		505	163	172332	214262	197253	207350	270795	289091
Methionine	Amino acid		150.2	61.2	3.09265e+06	2.04338e+06	6.40282e+06	4.64782e+06	726605	2.43238e+06
Methylitaconate	Organic acid		145	144	594202	1.11277e+06	1.46746e+06	976867	305839	574543
Met-ile	Amino acid derivative		263.15	87.05	121680	131356	68647.7	57930.2	288009	91146.8
MG 18:2	Lipids	Glycerolipids	355.3	95.1	3.95391e+06	4.88827e+06	1.37488e+07	7.76988e+06	4.68843e+06	8.16251e+06
MG 18:3	Lipids	Glycerolipids	353.25	81.05	621015	539171	2.50286e+06	106550	138631	129174
Momilactone A	Terpene		315.2	271.2	1.05682e+06	595491	1.07349e+06	982351	807194	1.50598e+06
Momilactone B	Terpene		331.1	269.2	11267.8	19832.9	18160.4	17278.6	22946	12529.5
Muramic acid	Organic acid		252	105	30217.6	27519.7	35905.9	25342.5	5353.84	6786.95
N-(2-hydroxyethyl)-Nicotinamide	Vitamin		167	80	84228.8	104398	488226	99810.8	124166	93720
N-[4'-hydroxy-(E)-cinnamoyl]-L-aspartic acid	Amino acid derivative		280.1	147.05	1.23611e+06	1.66116e+06	2.94101e+06	1.65495e+06	19222.9	10405.4
N-[Methyl(7H-purin-6-yl)carbamoyl]-L-threonine	Amino acid derivative		295.2	150.2	4.19848e+06	2.71025e+06	3.75061e+06	2.98662e+06	1.89786e+06	1.3593e+06
N1-Acetylspermine	Polyamine		245.25	112.1	143758	141833	229025	213498	138191	93630.3
N1-methyl-nicotinamide	Vitamin	B3	138.05	94.05	1.0707e+08	1.54253e+08	1.23849e+08	1.49884e+08	1.21228e+07	2.43937e+07
N6,N6,N6-trimethyllysine	Amino acid derivative		189	144	8.79699e+06	1.59048e+07	2.32012e+07	1.52741e+07	3.90925e+06	8.37028e+06
N6-succinyladenosine	Nucleotide derivatives		384.1	252.05	3.28169e+06	2.81624e+06	3.4736e+06	4.16185e+06	2.68181e+06	2.47889e+06
N-Acetyl-DL-glutamic acid	Amino acid derivative		190	130	153468	103883	160034	202976	765795	380886
N-acetylglutamine	Amino acid derivative		189	171	2.36057e+06	4.79555e+06	5.91444e+06	4.2319e+06	1.3057e+06	2.48647e+06
N-acetylhistidine	Amino acid derivative		198.1	110.05	191326	1.003e+06	272452	250795	325453	804091
N-acetylisoleucine	Amino acid derivative		174.1	86.1	1.03432e+06	964052	835356	1.42213e+06	1.62091e+06	1.60594e+06
N-acetylleucine	Amino acid derivative		174	128	2.68628e+06	1.45415e+06	2.42406e+06	2.40647e+06	1.56076e+06	1.32519e+06
N-acetylneuraminic acid	Organic acid		310.1	292.3	197540	156651	156269	207897	84706.1	100734
N-acetylproline	Amino acid derivative		158.1	98.05	227617	132191	135834	122092	302936	134169
N-Acetylputrescine	Polyamine		131.1	72.1	794784	754360	2.52916e+06	552131	74087.5	251434
N-Acetyltryptamine	Amino acid derivative		203.1	143.9	67346.9	88821.6	50753.3	56514.4	73346.6	76129.7
N-alpha-acetylornithine	Amino acid derivative		175.1	112.1	1.1004e+06	1.14281e+06	1.33634e+06	632080	287430	278682
Naringin-unknown	Flavonoid		581.2	273.1	37610.3	52737.8	45143.2	28486.2	90284.6	142750
N-cinnamoyltyramine	Phenolamine		268	103	659.577	1323.44	558.883	2144.86	637.521	758.753
N-delta-acetylornithine	Amino acid derivative		175.1	60.1	3.81312e+06	4.35459e+06	5.11991e+06	2.44292e+06	661189	1.0079e+06
nervonate (24:1n9)	Lipids	FFA	367	321	194608	148877	273790	216280	146282	279139
N-Feruloyl putrescine	Phenolamine		265.1	177.1	4.69616e+06	1.50449e+06	944481	673586	1.06377e+07	584412
N-Hydroxy-L-tryptophan	Amino acid derivative		221.1	158.4	3.36213e+06	2.51453e+06	3.00918e+06	1.89081e+06	3.56921e+06	2.64189e+06
Niacin	Vitamin	B3	124.05	78.05	3.06559e+07	2.31429e+07	2.51123e+07	3.2746e+07	5.19625e+06	8.49403e+06
Hydroxyniacin	Vitamin	B3	140	94	803988	1.51886e+06	1.09096e+06	1.25997e+06	163892	132577
Niacinamide	Vitamin	B3	123.05	80.05	96899.1	270903	381703	100216	149393	168866
Nicotianamine	Vitamin	B3	304.15	185.3	3.03865e+06	5.28794e+06	5.50915e+06	9.81648e+06	7.44576e+06	3.51413e+06
Nicotiflorin-unknown	Flavonoid		595.15	449.1	297510	407099	591336	521639	1.59298e+06	1.86594e+06
nicotinamide adenine dinucleotide (NAD+)	Vitamin	B3	664	428	375483	503298	914820	485649	386902	196924
nicotinamide ribonucleotide (NMN)	Vitamin	B3	335	99	292478	204872	303001	357716	417959	361353
nicotinamide riboside	Vitamin	B3	256.1	73.05	687169	1.31674e+06	499206	1.0402e+06	958058	675692
Nicotinamide-N-oxide	Vitamin	B3	139.05	79.05	1.55157e+06	3.49606e+06	1.7591e+06	2.89365e+06	369849	359053
Nicotinate ribonucleoside	Vitamin	B3	256.2	124.1	3.20322e+07	3.47795e+07	3.15958e+07	5.19183e+07	2.0074e+07	3.41732e+07
Nicotinoylcholine	Vitamin		209	106	35378.7	19436.7	31231.1	24787.1	11478	19011.5
Nicotinuric acid	Vitamin		181	107	749373	255649	368792	297661	321064	162302
N-monomethylarginine	Amino acid derivative		189.15	70.05	2.3266e+06	2.66527e+06	4.18566e+06	2.07674e+06	430416	941911
Oleic Acid-biotin	Vitamin		523	505	6.39663e+06	57800	63928.2	43493.2	86155.5	62348
oleoyl ethanolamide	Lipids	PE	326	62	388441	284432	878256	612981	113177	160621
O-phospho-4-hydroxy-L-threonine	Amino acid derivative		216.05	96.95	24885.5	36996.2	22153.5	22012.2	34902.6	32515
O-Phosphocholine	Choline		184	125	4.85606e+06	6.21667e+06	1.57762e+07	1.77955e+07	2.85448e+06	3.551e+06
Ornithine	Organic acid		133	70.1	2.34212e+06	574045	1.53614e+06	640306	1.29948e+06	635246
orotic acid	Vitamin	B13	157	111	258202	262736	295112	152366	444589	191128
oxythiamine	Vitamin	B1	266	122	614088	1.01145e+06	533590	917523	810372	1.05172e+06
Pantetheine	Vitamin	B5	279.15	132.05	25957.2	20059.3	29052.4	41047.3	17074.1	11790.5
Pantothenic acid	Vitamin	B5	220.2	202.1	6580.17	5018.47	7335.46	7691.4	6377.65	13072.3
Pantothenol	Vitamin	B5	206.15	74.05	4617.9	4064.08	5500.81	4659.04	4185.33	3562.24
PC 16:0/16:0	Lipids	PC	734.55	184.05	1.04435e+08	3.3715e+07	1.36055e+08	6.54378e+07	4.76219e+07	5.63881e+07
PC 16:1/14:0	Lipids	PC	704.5	184.05	2.96231e+07	1.10106e+07	4.14649e+07	2.78558e+07	85036.8	1.23847e+07
PC 16:1/14:1	Lipids	PC	702.5	184.05	133659	19172.6	92299.3	68986	20538.7	4004.94
PC 16:1/15:0	Lipids	PC	718.55	577.5	4.34044e+07	2.36465e+07	4.26098e+07	2.9716e+07	2.67989e+07	2.10448e+07
PC 16:1/16:0	Lipids	PC	732.55	184.05	4.94847e+06	2.86108e+06	1.06539e+07	9.69204e+06	5.5912e+06	4.18697e+06
PC 16:1/16:1	Lipids	PC	730.55	184.05	2.0057e+08	1.13123e+08	3.41831e+08	1.88251e+08	1.4952e+08	1.28906e+08
PC 18:0/16:0	Lipids	PC	762.6	184.05	2.44247e+07	3.56468e+06	1.76506e+07	1.58946e+07	1.04625e+07	9.07185e+06
PC 18:1/16:0	Lipids	PC	760.6	184.05	2.87972e+08	2.75726e+08	2.98568e+08	2.89876e+08	2.81447e+08	2.86236e+08
PC 18:1/16:0	Lipids	PC	760.6	184.05	3.19964e+08	2.84718e+08	3.31545e+08	2.98522e+08	2.8185e+08	3.01652e+08
PC 18:2/15:0	Lipids	PC	744.55	184.05	9.50682e+06	7.09277e+06	3.00732e+07	9.28438e+06	6.70473e+06	6.97555e+06
PC 18:2/16:0	Lipids	PC	758.55	184.05	4.18768e+08	3.51016e+08	5.23678e+08	3.95226e+08	3.79625e+08	3.58418e+08
PC 18:3/14:0 or PC 18:2/14:1	Lipids	PC	728.45	184.05	3.46863e+07	1.43495e+07	1.19226e+08	2.42349e+07	7.8958e+06	1.48952e+07
PC 18:3/16:0	Lipids	PC	756.55	184.05	9.40336e+07	7.01146e+07	3.44918e+08	1.74706e+08	5.59018e+07	4.48328e+07
PC 19:1/16:0 or 20:1/15:0	Lipids	PC	774.6	184.05	1.1144e+07	5.4367e+06	2.4549e+07	9.20696e+06	6.01799e+06	4.66161e+06
PC 19:3/16:0	Lipids	PC	770.55	184.05	3.69708e+06	2.74528e+06	9.67892e+06	2.78561e+06	1.6106e+06	1.58015e+06
PC 20:4/16:0	Lipids	PC	782.55	125	8.21428e+06	5.24923e+06	1.4338e+07	6.32936e+06	5.46112e+06	4.59243e+06
PC 20:5/16:1	Lipids	PC	778.55	184.05	8.50795e+06	7.83529e+06	1.62282e+08	7.641e+07	4.44325e+06	9.07763e+06
PC 22:2/16:1	Lipids	PC	812.6	184.05	1.86626e+06	39800.8	1.12516e+07	2.21909e+06	801291	276495
p-coumaric acid	Polyphenol		165.05	91.05	1.17479e+06	1.52467e+06	1.16539e+06	1.67158e+06	895490	778595
p-Coumaroyl-D-glucose	Acylsugar		344.15	165.05	1.12316e+06	1.36999e+06	1.89921e+06	1.64112e+06	503915	719652
p-coumaroylserotonin	Phenolamine		323	147	143147	92568.3	171445	102679	168400	638523
PE 18:2/16:1	Lipids	PE	714.5	573.5	266194	280920	308317	466948	172821	70601.1
PE 18:3/16:0	Lipids	PE	714.5	573.5	7.90304e+06	2.86557e+06	4.12581e+07	8.98707e+06	3.2084e+06	2.91997e+06
PE 18:4/18:2 or 18:3/18:3	Lipids	PE	736.5	595.5	1.91368e+06	1.00733e+06	9.05629e+06	4.77534e+06	973435	925775
PE 18:4/18:2 or 18:3/18:3	Lipids	PE	736.5	595.45	2.25451e+06	1.48973e+06	9.70481e+06	4.58871e+06	1.4076e+06	1.09227e+06
PE 20:4/16:0	Lipids	PE	740.5	599.5	1.34755e+07	7.09615e+06	1.20251e+07	8.89665e+06	8.71181e+06	5.95746e+06
PE 20:5/16:0	Lipids	PE	738.5	597.5	3.28674e+07	1.78015e+07	3.29558e+07	2.28586e+07	2.64412e+07	1.80835e+07
Phe dihexosyl derivative	Amino acid derivative		508.2	166.1	157111	170056	216668	168824	15304.4	14371.9
Phenylalanine	Amino acid		166.2	120.1	6.82233e+07	6.88952e+07	2.28359e+08	7.28539e+07	5.32916e+07	3.85885e+07
phosphate	Organic acid		99	80.95	2.41893e+06	2.24623e+06	2.29403e+06	2.32499e+06	2.23757e+06	2.3203e+06
Phylloquinol/phyllohydroquinone	Vitamin	K	454.35	57.05	362006	219209	467851	256931	360405	366269
Phytocassane E	Terpene		317.2	299.2	149985	251305	328313	222963	213963	723665
phytosphingosine	Lipids	Sphingolipids	318	282	2.85669e+07	1.92092e+07	1.31273e+08	3.08696e+07	2.06157e+07	2.63132e+07
pipecolate	Organic acid		130.05	84.1	2.36554e+07	2.47496e+07	1.7621e+07	2.81734e+07	1.31414e+07	1.55433e+07
Pipecolinic acid	Organic acid		130.1	70	2.03254e+06	976288	4.90711e+06	3.02171e+06	5.01911e+06	650557
PLP	Vitamin	B6	248.05	140.05	81921.5	90220.8	55641	82440	51140.7	72458.8
preergocalciferol(preD2)	Vitamin	D	397.35	81.05	2.79017e+06	1.26941e+06	2.6971e+06	1.90452e+06	2.3797e+06	1.05878e+06
Pro dihexosyl derivative	Amino acid derivative		458.2	116.05	4.39773e+06	1.23607e+06	8.29899e+06	2.75004e+06	332339	1.25932e+06
Proline	Amino acid		116.1	70	1.01963e+08	3.46055e+07	1.46232e+08	8.93784e+07	1.18917e+07	4.4859e+07
PS 18:3/14:1	Lipids	PS	728.45	86.1	231690	84880	255733	189530	143054	155099
Putrescine derivative	Polyamine		437.2	420.2	2.21971e+06	4.01255e+06	843687	342787	2.26542e+06	2.61523e+06
pyridoxal	Vitamin	B6	168	150	122129	357844	126908	206172	335276	89154.8
Pyridoxamine	Vitamin	B6	169.1	134.05	1.6353e+06	494116	1.15372e+06	551422	1.45176e+06	466214
pyridoxate	Vitamin	B6	184	148	467587	581071	230268	287927	549292	285255
pyridoxine	Vitamin	B6	170	134	3.88909e+06	1.02742e+06	2.41777e+06	1.13577e+06	1.32211e+06	558223
Pyridoxine O-glucoside	Vitamin	B6	332.15	152.1	3.10952e+07	1.93968e+07	5.16332e+07	2.98285e+07	8.7108e+06	1.46209e+07
pyroglutamine	Amino acid derivative		129.05	56.05	1.08376e+06	536290	2.21806e+06	1.93862e+06	709557	769468
Reduced Vitamin K	Vitamin	K	581	563	85259	124683	263852	317734	284980	169451
Rhamnose	Saccharides		187	82	7.16193e+06	2.61945e+06	7.07386e+06	5.8952e+06	3.91737e+06	2.78532e+06
Rhoifolin	Flavonoid		579.15	271.05	1.10618e+06	1.41714e+06	602141	13957.3	444945	718017
Riboflavin	Vitamin	B2	377.15	243.1	755568	599582	794128	594946	794017	854974
Riboflavin cyclic-4',5'-phosphate	Vitamin	B2	439	255	4180.57	1635.01	3030.51	3696.51	2451.38	3904.54
roseoflavin	Vitamin	B2	406	227	3257.43	3166.79	4753.99	4292.11	3098.31	4671.49
Saccharopine	Amino acid		277.1	84.1	515656	258090	251558	282976	504154	324821
S-adenosylhomocysteine	Amino acid derivative		385	136	213795	58271.9	83706	91564.6	156266	38253.7
sebacate	Organic acid		203	157	2.42358e+06	1.94112e+06	2.15343e+06	1.3983e+06	3.32217e+06	2.44687e+06
Ser dihexosyl derivative	Amino acid derivative		448.15	106.05	1.22595e+06	1.46072e+06	3.2464e+06	2.15095e+06	772243	835853
Serine	Amino acid		106.1	60	1.15029e+06	806824	2.39423e+06	2.12476e+06	438539	726732
Serotonin	Amino acid derivative		177.1	160.1	6746.18	3757.29	7060.43	89246.4	66208.4	269020
Sinapoylcholine	Choline		310	251	4.83811e+06	2.52873e+06	1.60856e+07	1.70701e+07	728532	3.04882e+06
Spermidine	Polyamine		146.15	72.1	234152	197467	207836	176848	209204	197812
Spermine	Polyamine		203.2	84.1	43681.7	64567.6	80223.4	71970.3	80546	30101.9
Sphinganine	Lipids	Sphingolipids	302	254	3.6649e+06	2.47564e+06	1.33958e+07	2.04116e+06	759187	2.3723e+06
stachydrine	Organic acid		144	58	1.49191e+06	3.0021e+06	1.5887e+06	1.345e+06	4.45952e+06	6.82175e+06
stachyose	Saccharides		689.2	527.2	303120	336118	495725	299608	166722	218275
Stearidonic acid	Lipids	FFA	277.2	93	4.90041e+06	4.32672e+06	5.10831e+06	7.30048e+06	2.79575e+06	2.3296e+06
succinate	Organic acid		119.05	73.05	476208	302695	785807	453934	266651	353144
tartronate	Organic acid		121	77	7.62819e+06	4.89649e+06	1.05053e+07	1.11781e+07	185705	247089
taurine	Organic acid		126	44	61919.4	45487.3	111643	97669.2	121550	61973.1
thiamine	Vitamin	B1	265.1	122.05	9.11257e+06	1.82479e+07	2.6064e+06	9.39726e+06	1.27397e+07	1.5232e+07
Thr dihexosyl derivative	Amino acid derivative		462.2	120.05	584488	751140	1.24697e+06	795043	472784	504678
Threitol	Saccharides		145	55	2.02644e+06	2.80213e+06	2.2946e+06	2.23528e+06	1.7182e+06	1.83855e+06
Threonine	Amino acid		120.1	74	393092	281536	533735	488326	317359	316679
TPP	Vitamin	B1	423	423	1.60929e+06	1.28175e+06	733528	1.04109e+06	532799	957833
trans-zeatin N-glucoside	Phytohormone		382.2	220.2	845150	576269	777628	649827	1.23418e+06	762511
Tricetin 5-O-hexosyl-O-hexoside	Flavonoid		627.1	465.2	2.59524e+06	4.24219e+06	8.66572e+06	5.75131e+06	1.14172e+06	3.54217e+06
Tricin 5-O-hexoside	Flavonoid		493.1	331.1	5.06796e+07	4.93602e+07	4.10703e+07	3.75305e+07	2.79523e+07	2.58391e+07
Tricin 7-O-hexoside	Flavonoid		493.1	331.1	5.6808e+07	2.25269e+07	1.90753e+07	2.72746e+07	2.17507e+07	2.93559e+07
Tricin O-glucuronide-O-hexoside	Flavonoid		669.2	331	1.12908e+06	979609	4.87711e+06	2.6223e+06	634953	917789
Tricin O-hexosyl-O-hexoside	Flavonoid		655.2	331.1	797835	775580	162687	176563	219416	188442
Tricin O-hexosyl-O-hexoside	Flavonoid		655.2	331.05	2.44952e+06	3.91344e+06	443324	632826	552014	653855
Tricin O-rutinoside	Flavonoid		639.1	330.6	1.43522e+06	1.29082e+06	454020	1.76564e+06	2.05236e+06	2.40276e+06
Tricin O-sinapoylhexoside	Flavonoid		699.2	331.1	1.98011e+06	2.67493e+06	4.12219e+06	3.06421e+06	671201	1.57335e+06
Trigonelline	Vitamin	B3	138.1	94.2	1.26707e+08	1.46321e+08	1.31413e+08	1.59706e+08	1.15323e+07	2.57587e+07
Trioxilin B3	Lipids		355.2	111	1.36909e+06	1.20095e+06	3.25271e+06	1.97491e+06	1.27297e+06	2.13267e+06
trp-cys	Amino acid derivative		308.1	142.05	2.97567e+06	5.61683e+06	6.19433e+06	7.35827e+06	9.56949e+06	5.36927e+06
Tryptamine	Amino acid		161.1	144.2	41812.8	69196.7	89502.5	53567.7	20675.5	34275
Tyramine	Amino acid		138.1	121.1	88380.2	44164.6	44742.3	30948.6	38037.1	16545.5
Tyrosine	Amino acid		182.1	91	1.52695e+07	1.70948e+07	2.4086e+07	1.7149e+07	6.94395e+06	9.77338e+06
tyr-ser	Amino acid derivative		269.1	136.1	9336.54	8715.67	5108.89	7035.78	5999.12	3724.6
uracil	Nucleotide		113	96	1.16063e+06	1.66151e+06	1.51916e+06	1.40423e+06	1.39257e+06	930075
urate	Organic acid		168.9	151.8	273372	106405	190589	171236	228924	84310
Uridine	Nucleotide		245.1	113.05	681488	1.44266e+06	1.66681e+06	1.36674e+06	796670	825757
Val dihexosyl derivative	Amino acid derivative		460.2	118.1	1.2887e+07	1.01337e+07	2.75975e+07	1.37547e+07	3.64393e+06	5.47544e+06
Valine	Amino acid		118.1	72.2	7.71981e+06	5.22363e+06	1.42126e+07	7.9463e+06	4.4073e+06	5.32001e+06
val-pro	Amino acid derivative		205.1	117.1	8.8501e+06	1.68505e+07	2.35007e+07	1.50728e+07	4.34207e+06	8.63957e+06
valylisoleucine	Amino acid derivative		231.15	84.1	118761	88722.3	138373	138540	92494.5	93725.3
valylleucine	Amino acid derivative		231.15	84.1	131996	87033.3	116612	158107	81014.8	82198.2
Vanillin	Polyphenol		153.1	65.1	3.66085e+06	4.51741e+06	3.96989e+06	3.43504e+06	2.77058e+06	3.08058e+06
Vitexin	Flavonoid		433.1	283.05	119972	195051	170871	230760	52862.5	41105.1
Xanthine	Nucleotide		153	110	1.12437e+06	517686	1.05281e+06	388307	343643	428252
Xanthurenic acid	Organic acid		206.05	160.05	808945	499913	426918	658811	813913	693438
Xanthurenic acid O-hexoside	Acylsugar		368.1	206	640933	1.24591e+06	747947	612159	1.13695e+06	1.65786e+06
Zeatin	Phytohormone		220	67	28169.7	22067.9	74488.7	19845.8	4571.6	20990
α-Tocopherol	Vitamin	E	431.4	165.1	11518.1	12452.9	9969.99	6179.16	1622.82	1929.04
β-Tocopherol	Vitamin	E	417.35	151.05	5510.13	2709.56	5520.97	9393.88	2465.28	4237.85
β-Tocotrienol	Vitamin	E	411.3	151.05	7.13801e+06	9.92397e+06	5.3309e+06	7.52331e+06	1.23632e+07	1.06205e+07
γ-Tocopherol	Vitamin	E	417.35	151	6027.69	6299.47	7324.77	7056.58	6120.83	9042.16
δ-Tocopherol	Vitamin	E	403.35	137.05	15717.6	8282.84	17976.4	10944.1	6284.43	11742.7
δ-Tocotrienol	Vitamin	E	397.3	137.05	18258	25593.2	206905	80963.9	21970	64681.5
