# Supplementary material for: Photoperiod-Dependent Nutrient Accumulation in Rice Cultivated in Plant Factories: A Comparative Metabolomic Analysis
Source: Foods. 2024 May 16;13(10):1544. doi: 10.3390/foods13101544 (PMC11121446; doi:10.3390/foods13101544)
Supplement: Supplementary file 1 [file foods-13-01544-s001.zip › Table S2 Significant differentially accumulated metabolites between rice grains under SD and LD in HHZ.xlsx]

## Sheet: Sheet1
Table S2 Significant differentially accumulated metabolites between rice grains under SD and LD in HHZ
Name	VIP	P-value	Fold_Change	Log2FC
2-(5-hydroxy-1H-indol-3-yl)acetic acid	1.43515	0.000399683	0.12848	-2.96039
2-aminoadipate	1.43115	5.40995e-05	0.211583	-2.24071
2-Methylnicotinamide	1.34202	0.014011	0.277007	-1.85201
3-Hydroxy-3-Methyl Butyric Acid	1.43436	0.000911844	0.158349	-2.65882
4-amino-butanoate	1.36982	0.020254	0.373913	-1.41922
5'-Deoxy-5'-(methylthio)adenosine	1.42465	0.00381925	0.308614	-1.69613
Adenine	1.38111	0.00689348	0.450725	-1.14968
Asparagine	1.32255	0.0344806	0.490069	-1.02894
Betaine	1.42805	0.00168584	0.169682	-2.55909
Carnitine	1.41784	0.000360605	0.365922	-1.45039
FA 12:2	1.4037	0.00233727	0.394773	-1.34091
Feruloylquinic acid	1.30931	0.045112	0.311283	-1.6837
Gamma-glutamyl Glutamine	1.35705	0.00578454	0.391616	-1.35249
gamma-glutamylglutamine	1.40986	0.004581	0.339599	-1.5581
IAA	1.34645	0.00779701	0.136742	-2.87047
Inosine	1.40275	0.0117189	0.157758	-2.66422
Kynurenic Acid	1.42348	0.0040179	0.338916	-1.561
L-Ascorbic acid O-pentose	1.36806	0.00780042	0.317122	-1.65689
Lysine butyrate	1.43539	0.000289917	0.0404369	-4.62819
Met-ile	1.39008	0.0118681	0.316471	-1.65985
N-Acetyl-DL-glutamic acid	1.33565	0.0380333	0.497373	-1.0076
N-acetylproline	1.17869	0.0476004	0.442897	-1.17496
N-Feruloyl putrescine	1.43045	0.00231615	0.0549379	-4.18605
Nicotianamine	1.42865	0.00292481	0.471964	-1.08325
Pipecolinic acid	1.42427	0.000198115	0.129616	-2.94768
pyridoxal	1.2977	0.0310536	0.265915	-1.91096
Pyridoxamine	1.39301	0.0133694	0.321138	-1.63874
pyridoxine	1.39746	0.00123889	0.422222	-1.24393
Spermine	1.31081	0.0179896	0.373724	-1.41996
urate	1.37425	0.00407538	0.368288	-1.44109
1-methyladenine	1.36181	0.0193384	2.60485	1.3812
AICA	1.331	0.0375684	14.1905	3.82685
Ala dihexosyl derivative	1.34367	0.00724383	2.04237	1.03025
Aminobutyric Acid	1.3881	0.00230535	2.22549	1.15412
Asn-trp	1.43232	0.000410764	2.14695	1.10229
asp-ala	1.43475	1.39402e-05	2.0255	1.01828
Biotin sulfone	1.43251	0.000477774	46.6029	5.54235
C-pentosyl-apigenin O-hexoside	1.4243	0.000222238	2.67055	1.41714
dihydroferulic acid	1.1733	0.0463356	2.38232	1.25237
dimethylarginine	1.33025	0.0387859	4.13507	2.04791
dl-alpha-Tocopherol nicotinate	1.4306	0.000164162	3.77691	1.9172
gamma-glutamylglycine	1.42601	0.000683218	2.1518	1.10554
indole-3-acetyl-L-asparticacid	1.43666	0.000333842	4.7936	2.26111
indole-3-lactic acid	1.41208	0.00227201	2.09507	1.067
indolelactate	1.42722	0.000273156	2.07512	1.05319
LysoPE 18:1	1.38674	0.00243136	2.11303	1.07931
N6,N6,N6-trimethyllysine	1.42746	0.000422031	2.14115	1.09838
N-Acetylputrescine	1.40626	0.00322615	3.39374	1.76288
N-monomethylarginine	1.43726	1.88643e-06	2.18837	1.12986
PC 20:5/16:1	1.29905	0.0146146	2.04301	1.0307
p-coumaroylserotonin	1.42874	0.00179059	3.7917	1.92285
Phytocassane E	1.42801	0.00160426	3.3822	1.75796
Sinapoylcholine	1.43711	1.81518e-05	4.18489	2.06519
Sphinganine	1.24329	0.0252463	3.12479	1.64376
Tricetin 5-O-hexosyl-O-hexoside	1.41362	0.00783859	3.1025	1.63343
Tricin O-sinapoylhexoside	1.43536	0.000107981	2.34408	1.22902
Trigonelline	1.42565	9.22743e-05	2.23362	1.15939
δ-Tocotrienol	1.37442	0.00736862	2.94408	1.55782
Screening was performed in setting the variable importance in projection VIP ≥ 1, |log2FC| ≥ 1, and P value < 0.05.
