# Supplementary material for: Photoperiod-Dependent Nutrient Accumulation in Rice Cultivated in Plant Factories: A Comparative Metabolomic Analysis
Source: Foods. 2024 May 16;13(10):1544. doi: 10.3390/foods13101544 (PMC11121446; doi:10.3390/foods13101544)
Supplement: Supplementary file 1 [file foods-13-01544-s001.zip › Table S3 Significant differentially accumulated metabolites between rice grains under SD and LD in KY131.xlsx]

## Sheet: Sheet1
Table S3 Significant differentially accumulated metabolites between rice grains under SD and LD in KY131
Name	VIP	P-value	Fold_Change	Log2FC
1alpha,24R,25-Trihydroxyvitamin D3;Calcitetrol	1.31603	0.000856588	0.479232	-1.0612
3-methylglutaconate	1.31733	0.000805784	0.332845	-1.58708
5-Amino-6-ribitylamino uracil	1.30072	0.00131832	0.493932	-1.01762
Ala-val	1.32706	5.02861e-05	0.487579	-1.03629
Apigenin 6-C-glucoside	1.31838	0.000992929	0.495578	-1.01281
Asp dihexosyl derivative	1.2505	0.0344576	0.499982	-1.00005
Bisnorbiotin	1.33227	4.45642e-06	0.222617	-2.16736
CDP-choline	1.18597	0.0449634	0.496853	-1.00911
C-hexosyl-luteolin O-pentoside	1.22578	0.0156286	0.432659	-1.2087
Chrysoeriol 5-O-hexoside	1.31055	0.00325194	0.481567	-1.05419
C-pentosyl-luteolin O-hexoside	1.28482	0.00238054	0.353423	-1.50053
Glucose(+)	1.31772	0.000192888	0.338549	-1.56256
Hepoxilin B3	1.30224	0.0117837	0.296312	-1.75481
Indole-3-carboxaldehyde	1.3259	0.000121339	0.483229	-1.04922
inositol pentakisphosphate	1.28419	0.00306044	0.401274	-1.31734
Luteolin 6-C-glucoside	1.3254	0.00323229	0.125129	-2.99852
N-acetylglutamine	1.32711	5.40885e-05	0.492242	-1.02256
N-acetylhistidine	1.24692	0.0306848	0.190754	-2.39022
Uridine	1.18325	0.0282172	0.472382	-1.08197
4-Phosphopantoate	1.17603	0.0228313	2.28631	1.19302
1-palmitoylglycerol (16:0)	1.24384	0.00741131	2.07123	1.05049
1-stearoyl-GPE (18:0)	1.23649	0.0343908	2.27588	1.18642
2-(5-hydroxy-1H-indol-3-yl)acetic acid	1.28342	0.0165052	3.82353	1.9349
3-sulfo-L-alanine/Cysteic acid	1.27301	0.00699345	2.73928	1.4538
4-amino-butanoate	1.28863	0.00490054	2.83116	1.50139
Adenine	1.27134	0.00344848	2.05805	1.04128
Adenosine O-ribose	1.27927	0.0108781	3.53988	1.8237
Alanine	1.31866	0.000694047	2.61993	1.38953
alpha.epsilon-Diaminopimelic acid	1.28079	0.0198365	4.30905	2.10737
Asn dihexosyl derivative	1.26813	0.0165381	3.20228	1.6791
Asparagine	1.32166	0.000161553	4.11776	2.04186
Sitosterol	1.191	0.0381202	2.05049	1.03597
Dihydrozeatin-O-glucoside	1.11306	0.0428012	2.13848	1.09659
Episterol	1.29718	0.00218803	5.09674	2.34957
Ergosterol	1.23524	0.0276714	3.26921	1.70894
FA 12:2	1.31784	0.000215551	3.03942	1.6038
fumarate	1.29995	0.00159866	3.706	1.88986
Gamma-glutamyl Glutamine	1.3197	0.00327278	3.19229	1.67459
gamma-glutamylalanine	1.23438	0.0130136	2.57737	1.3659
gamma-glutamylglutamine	1.3315	0.000635987	3.20738	1.68139
gamma-glutamylisoleucine	1.30069	0.00100529	2.24463	1.16648
gamma-glutamylleucine	1.2638	0.016443	2.00438	1.00315
Glutamine	1.32155	0.000294103	2.31986	1.21404
glutarate (pentanedioate)	1.27831	0.00735226	2.93107	1.55143
IAA	1.24421	0.0095421	3.40967	1.76963
Lysine	1.3296	1.07e-05	2.13279	1.09274
LysoPC 14:1	1.23421	0.029492	2.05572	1.03964
LysoPC 20:0	1.22686	0.0408231	3.96242	1.98638
LysoPC 20:2 (sn-1)	1.31668	0.0004056	2.254	1.17249
N-Feruloyl putrescine	1.24551	0.0302077	3.12144	1.64221
Nicotinuric acid	1.31608	0.00126872	2.93126	1.55152
Ornithine	1.31844	0.00030072	4.08003	2.02858
PC 16:0/16:0	1.25862	0.0238944	3.09759	1.63115
PC 16:1/14:1	1.28183	0.0116972	6.97132	2.80143
PC 18:0/16:0	1.26726	0.0261932	6.85187	2.7765
PC 22:2/16:1	1.21844	0.0466816	46.89	5.55121
Proline	1.28788	0.0105269	2.94644	1.55897
PS 18:3/14:1	1.2514	0.0194214	2.72961	1.4487
Pyridoxamine	1.3126	0.00342162	3.30955	1.72664
pyridoxine	1.29725	0.0101729	3.78528	1.9204
pyroglutamine	1.31795	0.00255886	2.02084	1.01496
Rhamnose	1.22446	0.011533	2.73413	1.45108
urate	1.24617	0.0114672	2.56917	1.3613
Xanthine	1.1981	0.0163434	2.17191	1.11896
Screening was performed in setting the variable importance in projection VIP ≥ 1, |log2FC| ≥ 1, and P value < 0.05.
