# Supplementary material for: Photoperiod-Dependent Nutrient Accumulation in Rice Cultivated in Plant Factories: A Comparative Metabolomic Analysis
Source: Foods. 2024 May 16;13(10):1544. doi: 10.3390/foods13101544 (PMC11121446; doi:10.3390/foods13101544)
Supplement: Supplementary file 1 [file foods-13-01544-s001.zip › Table S4 Significant differentially accumulated metabolites between rice grains under SD and LD in KSR.xlsx]

## Sheet: Sheet1
Table S4 Significant differentially accumulated metabolites between rice grains under SD and LD in KSR
Name	VIP	P-value	Fold_Change	Log2FC
1alpha,24R,25-Trihydroxyvitamin D3;Calcitetrol	1.31166	0.000107383	0.156514	-2.67564
1-myristoylglycerol (14:0)	1.22977	0.0278325	0.343574	-1.54131
25-hydroxyvitamin D3	1.23469	0.0168471	0.357498	-1.48399
4-Methyl-(2'-hydroxyethyl)-thiazole	1.27763	0.0055829	0.458079	-1.12633
Apigenin 6-C-glucoside	1.30825	0.00063757	0.167495	-2.57781
Calcitriol	1.30113	0.0038159	0.194101	-2.36512
folinic acid	1.2884	0.00227172	0.20288	-2.3013
Hepoxilin B3	1.27434	0.00206206	0.230854	-2.11495
Isovitexin	1.3121	0.000112644	0.169375	-2.56171
Luteolin 6-C-glucoside	1.30546	0.00296468	0.0995324	-3.32869
Serotonin	1.28887	0.00794223	0.0791117	-3.65997
1-linoleoyl-2-linolenoyl-GPC (18:2/18:3)	1.27562	0.0111775	2.90214	1.53712
1-stearoyl-2-oleoyl-GPC (18:0/18:1)	1.16869	0.0174926	2.18644	1.12858
1-stearoyl-GPE (18:0)	1.2807	0.000964256	3.15389	1.65713
2-[(8-Carboxyoctanoyl)oxy]-3-(palmitoyloxy)propyl 2-(trimethylammonio)ethyl phosphate	1.28279	0.00442788	2.55961	1.35593
3-[(1-Carboxyethenyl)oxy]benzoic acid	1.27973	0.00363574	2.14762	1.10274
3-sulfo-L-alanine/Cysteic acid	1.26224	0.00432597	2.51527	1.33071
4-amino-butanoate	1.29759	0.00522669	4.34602	2.1197
AICA	1.2448	0.00720978	2.96655	1.56879
alpha.epsilon-Diaminopimelic acid	1.29177	0.000555698	3.18648	1.67196
arabonate	1.31221	9.87696e-05	3.14084	1.65115
Asn dihexosyl derivative	1.26619	0.0122482	3.08601	1.62574
Asparagine	1.31066	2.58164e-05	2.65904	1.41091
Biotin sulfone	1.3013	0.000261789	9.7055	3.2788
dimethylarginine	1.30065	0.00336046	2.1581	1.10976
Episterol	1.27491	0.00163832	3.33339	1.73699
Ergocalciferol	1.21742	0.0308866	3.43538	1.78047
FA 20:5-OH	1.1733	0.0445513	4.33523	2.11611
fumarate	1.31064	7.67462e-05	2.41566	1.27242
Glutamine	1.30959	0.000385138	2.09404	1.06629
Glycidyl oleate	1.28297	0.00176238	2.92548	1.54868
GPCho 36:0	1.12259	0.0437729	2.64283	1.40209
guanidinosuccinic acid	1.19077	0.0319684	2.79692	1.48384
indole-3-acetyl-L-asparticacid	1.254	0.0061185	2.39691	1.26118
Leucine	1.27311	0.00976503	2.06731	1.04776
L-Isoleucine	1.29884	0.000184799	2.37478	1.2478
LysoPC 20:0	1.27692	0.00953614	5.04051	2.33357
LysoPE 15:0	1.24113	0.0123088	3.48715	1.80205
LysoPE 18:1	1.26302	0.00530011	2.04239	1.03026
MG 18:3	1.24704	0.0254186	23.49	4.55397
N-Acetylputrescine	1.25865	0.0102537	4.58071	2.19557
N-alpha-acetylornithine	1.24087	0.0134288	2.11419	1.08011
N-delta-acetylornithine	1.28655	0.00260766	2.09581	1.06751
N-monomethylarginine	1.30624	0.000176395	2.0155	1.01114
Ornithine	1.30793	0.000228712	2.39907	1.26247
PC 16:0/16:0	1.22278	0.0116122	2.07915	1.056
PC 18:2/15:0	1.29606	0.00372584	3.23912	1.6956
PC 18:3/14:0 or PC 18:2/14:1	1.28029	0.00648482	4.91961	2.29854
PC 19:1/16:0 or 20:1/15:0	1.13226	0.0493594	2.66635	1.41487
PC 19:3/16:0	1.29163	0.000742356	3.47461	1.79685
PC 20:4/16:0	1.27423	0.00984299	2.26531	1.17971
PC 20:5/16:1	1.25843	0.00650712	2.12383	1.08667
PE 18:3/16:0	1.14497	0.0246454	4.59083	2.19875
PE 18:4/18:2 or 18:3/18:3	1.20786	0.00923963	2.11493	1.08061
Phenylalanine	1.31173	0.000131974	3.13448	1.64822
phytosphingosine	1.22314	0.0194674	4.2525	2.08831
Pro dihexosyl derivative	1.30612	0.00166867	3.01777	1.59348
Putrescine derivative	1.3107	6.74477e-06	2.46126	1.29939
Pyridoxamine	1.26221	0.0110179	2.09227	1.06507
pyridoxine	1.18701	0.043387	2.12875	1.09001
Val dihexosyl derivative	1.19282	0.0429576	2.0064	1.00461
Xanthine	1.30252	0.00199695	2.71127	1.43897
δ-Tocotrienol	1.29256	0.00648109	2.55552	1.35362
Screening was performed in setting the variable importance in projection VIP ≥ 1, |log2FC| ≥ 1, and P value < 0.05.
